# Supplementary material for: Lead-free double perovskites: how divalent cations tune the electronic structure for photovoltaic applications
Source: Royal Society of Chemistry journal article supplement (doi:10.1039/d2tc02903k), 2022-01-01
Supplement: d2tc02903k1.pdf [file d2tc02903k1.pdf]

## **Supplementary information**

### **Lead-free double perovskites: how divalent cations tune the electronic structure for photovoltaic applications**

Ismail A. M. Ibrahim<sup>a,b</sup> and Chan-Yeup Chung<sup>a</sup>

<sup>a</sup>Division of Carbon Neutrality & Materials Digitalization, Korea Institute of Ceramic Engineering & Technology, Jinju 52851, South Korea.

<sup>b</sup>Department of Chemistry, Faculty of Science, Helwan University, 11795 Cairo, Egypt.

E-mail:

ibrahim@kicet.re.kr, ismail.ibrahim@science.helwan.edu.eg (Ismail Ibrahim)

chanyeup@kicet.re.kr (Chan-Yeup Chung)

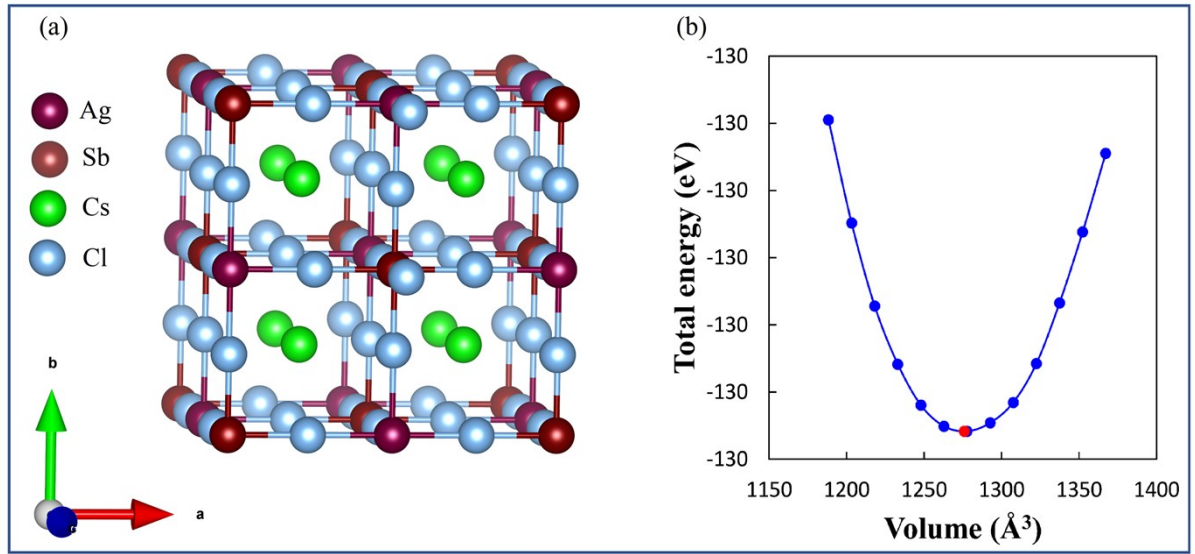

**Figure S1:** (a) Conventional cell and (b) Total energy–Volume curve of pristine Cs<sub>2</sub>AgSbCl<sub>6</sub> double perovskite. The red ball represents the equilibrium volume by the third-order Birch-Murnaghan equation of states.

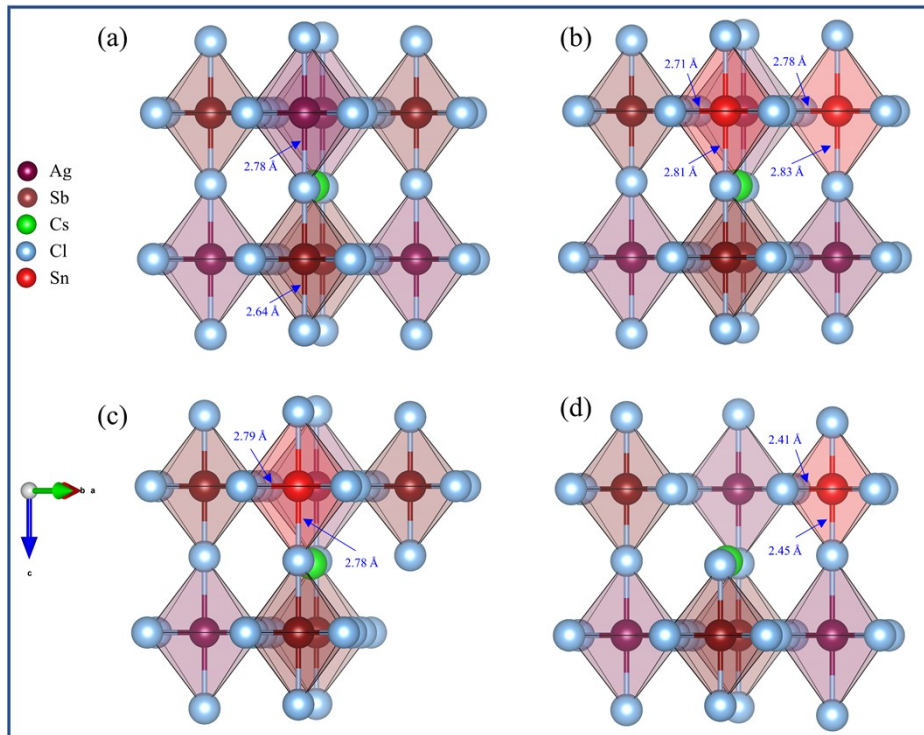

**Figure S2:** Octahedral symmetry in (a) the pristine, and (b) Sn<sup>2+</sup>–Sn<sup>2+</sup>, (c) Sn<sup>2+</sup>–V<sub>Ag</sub>, and (d) Sn<sup>4+</sup>–V<sub>Ag</sub> doped perovskites.

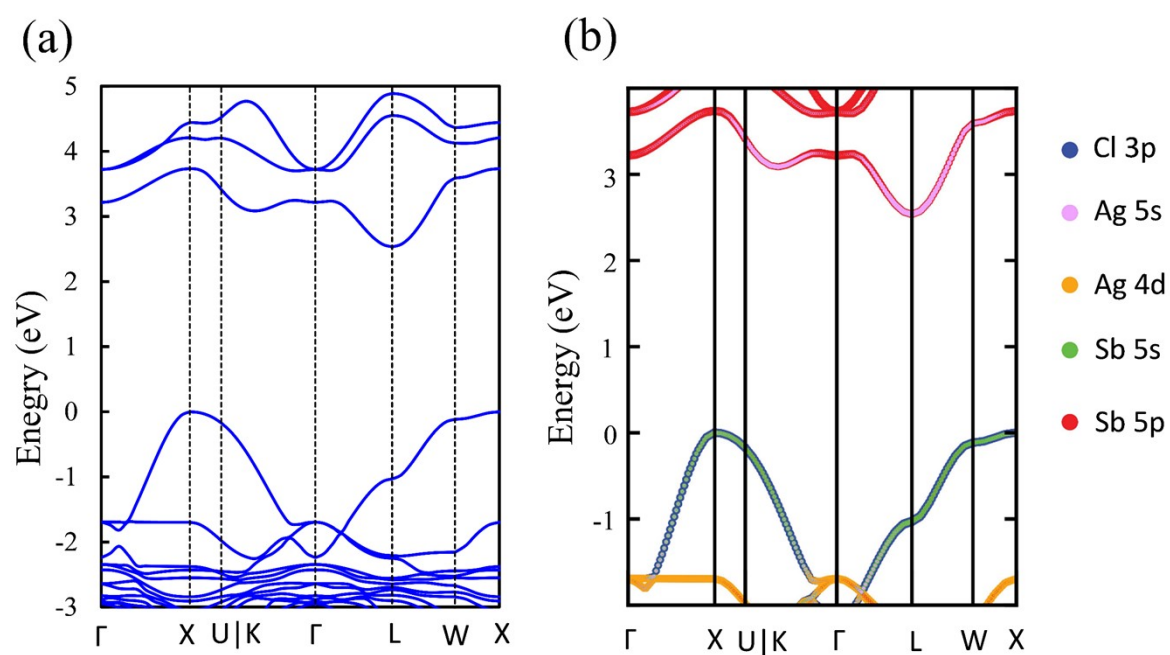

**Figure S3:** (a) Band structure and (b) partial band structure of pristine  $\text{Cs}_2\text{AgSbCl}_6$  primitive cell.

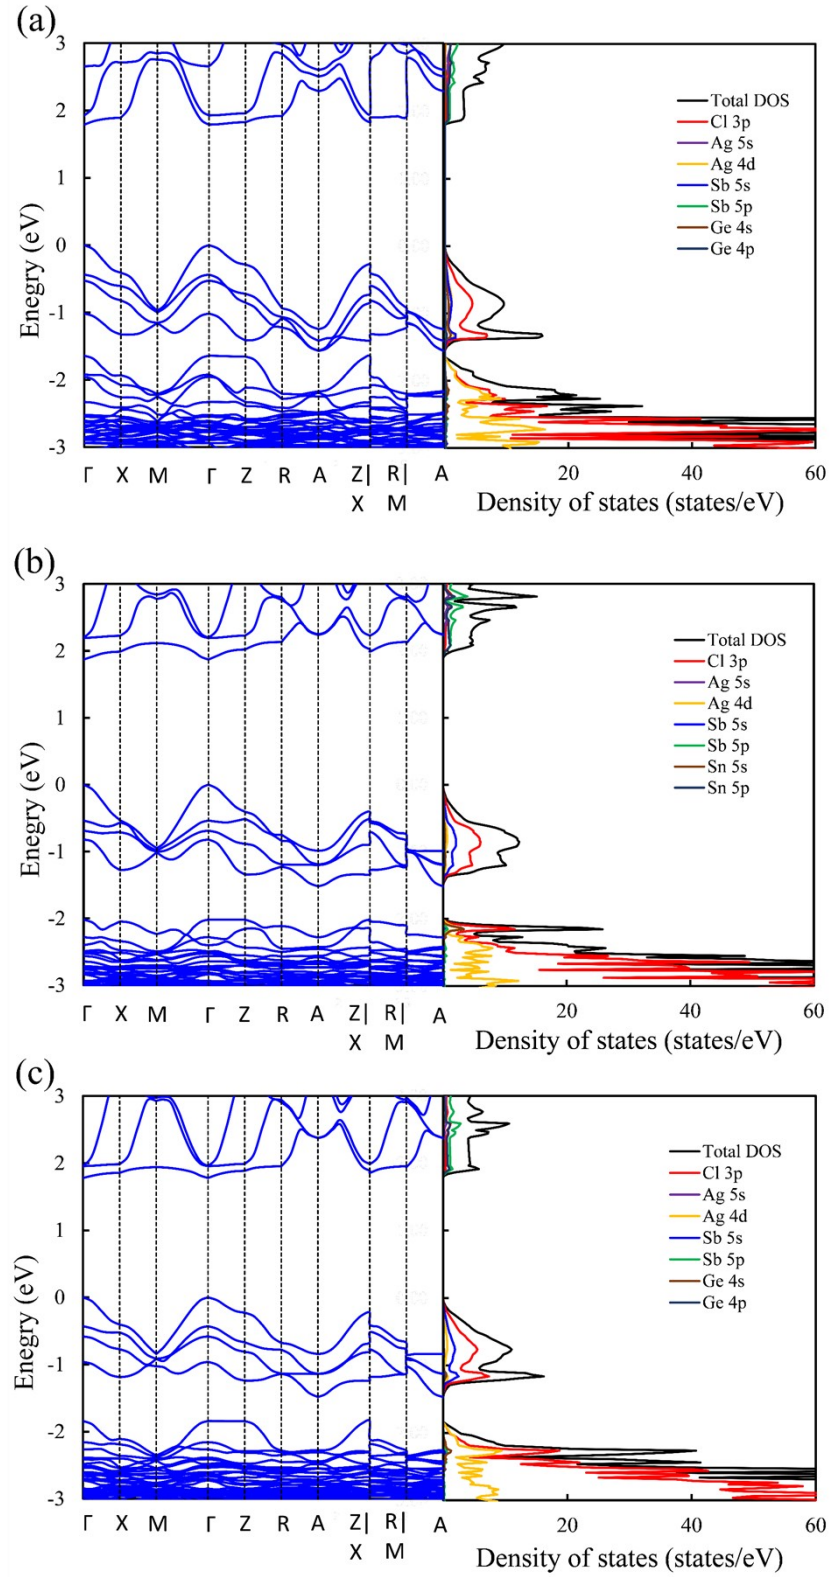

**Figure S4:** Band structure (left) and density of states (right) of (a)  $\text{Ge}^{2+}\text{-Ge}^{2+}$ , (b)  $\text{Sn}^{2+}\text{-V}_{\text{Ag}}$ , and (c)  $\text{Ge}^{2+}\text{-V}_{\text{Ag}}$  doped perovskites.

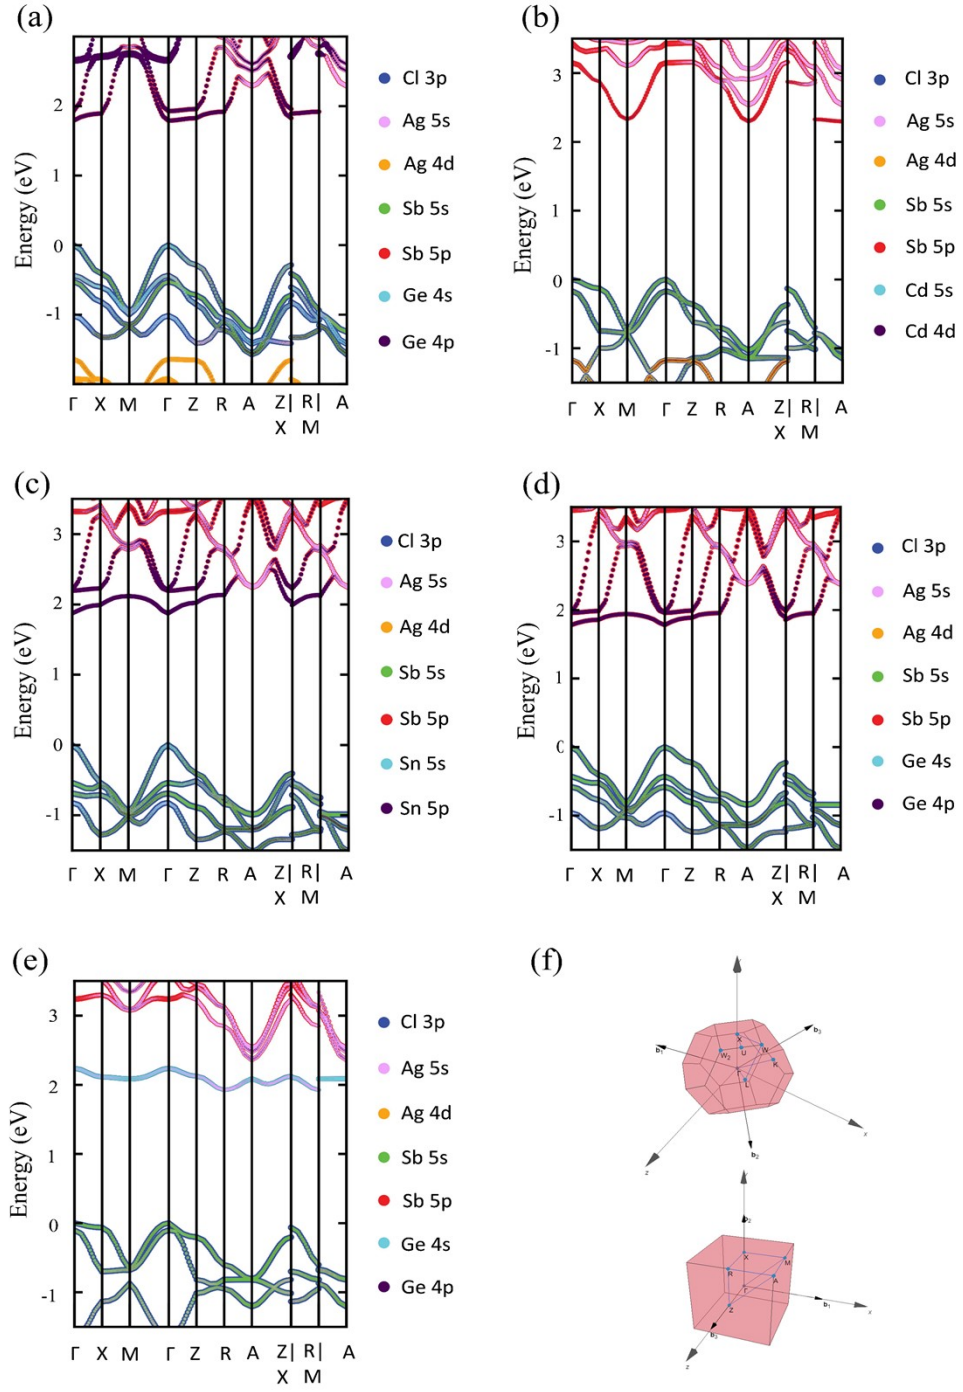

**Figure S5:** Partial band structure of (a)  $\text{Ge}^{2+}\text{-Ge}^{2+}$ , (b)  $\text{Cd}^{2+}\text{-Cd}^{2+}$ , (c)  $\text{Sn}^{2+}\text{-V}_{\text{Ag}}$ , (d)  $\text{Ge}^{2+}\text{-V}_{\text{Ag}}$ , and (e)  $\text{Ge}^{4+}\text{-V}_{\text{Ag}}$  doped perovskites. (f) The suggested Brillouin zone path of the pristine primitive cell (up) and doped perovskites (down).

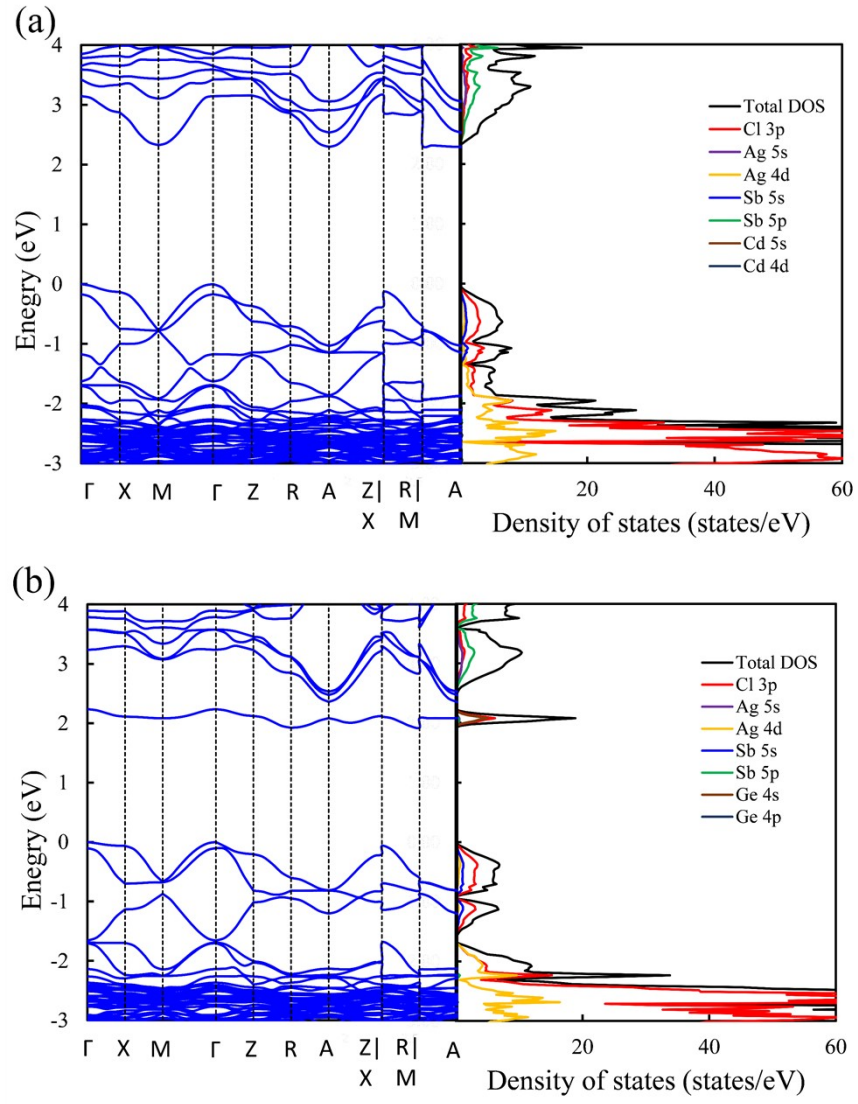

**Figure S6:** Band structure (left) and density of states (right) of (a)  $\text{Cd}^{2+}\text{-Cd}^{2+}$  and (b)  $\text{Ge}^{4+}\text{-V}_{\text{Ag}}$  doped perovskites.

**Table S1:** Average Bader charge (e) per atom in the pristine and all of the doped perovskites. Negative charges indicate gain of electrons and positive charges indicate loss of electrons.

| Perovskite                         | Bader charge (e) |       |       |        |       |
|------------------------------------|------------------|-------|-------|--------|-------|
|                                    | Cs               | Ag    | Sb    | Cl     | M     |
| Pristine                           | 0.888            | 0.610 | 1.767 | −0.692 |       |
| Sn <sup>2+</sup> –Sn <sup>2+</sup> | 0.906            | 0.673 | 1.752 | −0.718 | 1.358 |
| Ge <sup>2+</sup> –Ge <sup>2+</sup> | 0.897            | 0.636 | 1.718 | −0.691 | 1.174 |
| Zn <sup>2+</sup> –Zn <sup>2+</sup> | 0.901            | 0.608 | 1.836 | −0.701 | 1.146 |
| Cd <sup>2+</sup> –Cd <sup>2+</sup> | 0.901            | 0.635 | 1.805 | −0.699 | 1.127 |
| Sn <sup>2+</sup> –V <sub>Ag</sub>  | 0.905            | 0.650 | 1.759 | −0.704 | 1.305 |
| Ge <sup>2+</sup> –V <sub>Ag</sub>  | 0.905            | 0.640 | 1.719 | −0.692 | 1.221 |
| Sn <sup>4+</sup> –V <sub>Ag</sub>  | 0.899            | 0.597 | 1.733 | −0.670 | 1.909 |
| Ge <sup>4+</sup> –V <sub>Ag</sub>  | 0.899            | 0.567 | 1.760 | −0.659 | 1.658 |

**Table S2:** The calculated effective mass ( $|m^*|$ ) of electrons and holes (in a unit of bare electron mass  $m_e$ ) along the  $\Gamma$ –M path for the proposed Sn<sup>2+</sup> and Ge<sup>2+</sup>-based perovskites.

| Perovskite                         | $ m^* $  |       |
|------------------------------------|----------|-------|
|                                    | electron | hole  |
| Sn <sup>2+</sup> –Sn <sup>2+</sup> | 0.257    | 0.365 |
| Ge <sup>2+</sup> –Ge <sup>2+</sup> | 0.252    | 0.361 |
| Sn <sup>2+</sup> –V <sub>Ag</sub>  | 0.719    | 0.326 |
| Ge <sup>2+</sup> –V <sub>Ag</sub>  | 1.184    | 0.403 |
